# Supplementary material for: Evolution of S-domain receptor-like kinases in land plants and origination of S-locus receptor kinases in Brassicaceae
Source: PubMed Central journal article supplement (PMC3616866; doi:10.1186/1471-2148-13-69), 2013-03-19

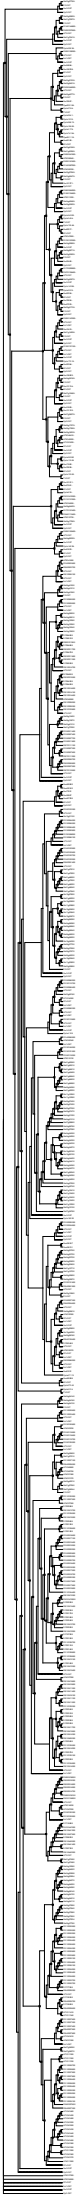

Supplement: 1471-2148-13-69-S3.pdf [file 1471-2148-13-69-S3.pdf]
