# Supplementary material for: Evolution of S-domain receptor-like kinases in land plants and origination of S-locus receptor kinases in Brassicaceae
Source: BMC Evol Biol. 2013 Mar 19;13:69. doi: 10.1186/1471-2148-13-69 (PMC3616866; doi:10.1186/1471-2148-13-69)
Supplement: Additional file 7 — Supporting dataset 2. Alignment of KD sequences from 47 Brassicaceae SRK sequences. [file 1471-2148-13-69-S7.pdf]

BraSRK40 ....NKVCKGGFGVWYKGR.LVDGQEIIVKRLSEMSAQGTDEEFMNEVRLIAKLQHNVLRLGGCCVYEGEKILLIYEYENLSLDSHLFDETRGC.MLNWQ 94  
BraSRK44 ....NKVCKGGFGVWYKGR.LVDGQEIIVKRLSEMSAQGTDEEFMNEVRLIAKLQHNVLRLGGCCVYEGEKILLIYEYENLSLDSHLFDETRSC.MLNWQ 94  
BraSRK29 ....NKVCKGGFGVWYKGR.LVDGQEIIVKRLSEMSAQGTDEEFMNEVRLIAKLQHNVLRLGGCCVYEGEKILLIYEYENLSLDSHLFDEGRSC.KLNWQ 94  
BraSRK60 ....NKVCKGGFGVWYKGR.LVDGQEIIVKRLSEMSAQGTDEEFMNEVRLIAKLQHNVLRLGGCCVYEGEKILLIYEYENLSLDSHLFDETRSC.MLNWQ 94  
BraSRK12 ...CNEICQGGFGFIVYKG..MLDGQEVAVKRLSKTSIQGIDEFMNEVRLIARLQHINVLRLIGCCIEADEKILLIYEYENSSLDYFLFGKKRSS.NLNWK 94  
BraSRK46 ...CNEICRGGFGFIVYKG..MLDGQEVAVKRLSKTSIQGIDEFMNEVRLIARLQHINVLRLIGCCIEAGEKILLIYEYENSSLDYFLFGKKRSS.NLNWK 94  
BraSRK8 ...CNEICRGGFGFIVYKG..MLDGQEVAVKRLSKTSIQGIDEFMNEVRLIARLQHINVLRLIGCCIEAGEKILLIYEYENSSLDYFLFGKKRSS.NLNWK 94  
BraSRK9 ...CNKLCQGGFGFIVYKG..TLDGQEIIVKRLSKTSVQGADEEFMNEVRLIARLQHINVLRLIGCCIDADEKMLIYEYENLSLDSYFLGKTRSS.KLNWK 94  
BraSRK22 ...CNEICRSGFGFIVYKG..MLDGQEVAVKRLSKTSIQGIDEFMNEVRLIARLQHINVLRLIGCCIEADEKILLIYEYENSSLDYFLFGKKRSS.NLNWK 94  
BraSRK... ...CNKLCQGGFGFIVYKGR.LLDGQEIIVKRLSKTSVQGTDEEFMNEVRLIARLQHINVLRLIGCCIEADEKMLIYEYENLSLDCYFLGKTQRS.KLNWK 94  
BraSRK45 ...CNKLCQGGFGFIVYKGR.LLDGQEIIVKRLSKTSVQGTDEEFMNEVRLIARLQHINVLRLIGCCIEADEKMLIYEYENLSLDSYFLGKTQRS.KLNWK 95  
BraSRK-53 ...CNKLCQGGFGFIVYKGR.LPDGQEIIVKRLSKTSVQGTDEEFMNEVRLIARLQHINVLRLIGCCIEADEKMLIYEYENLSLDSYFLGKTQRS.KLNWK 94  
BraSRK-54 ...CNEICRGGFGFIVYKG..MLDGQEVAVKRLSKTSIQGIDEFMNEVRLIARLQHINVLRLIGCCIEADEKILLIYEYENSSLDYFLFGKKRSS.NLNWK 94  
BraSRK-55 ...NELCQGGFGFIVYKG..MLDGQEVAVKRLSKTSIQGIDEFMNEVRLIARLQHINVLRLIGCCIEADEKILLIYEYENSSLDYFLFGKKRSS.HLNWK 93  
BraSRK-56 ...CNKLCQGGFGFIVYKG..MLDGQEVAVKRLSKTSIQGIDEFMNEVRLIARLQHINVLRLIGCCIEADEKILLIYEYENLSLDSYFLGKTQRS.KLNWK 95  
BraSRK-61 ...CNEICRGGFGFIVYKG..MLDGQEVAVKRLSKTSIQGIDEFMNEVRLIARLQHINVLRLIGCCIEAGEKILLIYEYENSSLDYFLFGKKRSS.NLNWK 94  
Bo1SRK15 ....NKVCKGGFGVWYKGR.LVDGQEIIVKRLSEMSAQGTDEEFMNEVRLIAKLQHNVLRLGGCCVYEGEKILLIYEYENLSLDSHLFDETRSC.MLNWQ 94  
Bo1SRK2 ....NKVCKGGFGVWYKGR.LVDGQEIIVKRLSEMSAQGTDEEFMNEVRLIAKLQHNVLRLGGCCVYEGEKILLIYEYENLSLDSHLFDETRSC.MLNWQ 94  
Bo1SRK5 ....NKVCKGGFGVWYKGR.LVDGQEIIVKRLSEMSAQGTDEEFMNEVRLIAKLQHNVLRLGGCCVYEGEKILLIYEYENLSLDSHLFDETRSC.MLNWQ 94  
Bo1SRK6 ...CNKLCQGGFGFIVYKGR.LLDGKEIIVKRLSKTSVQGTDEEFMNEVRLIARLQHINVLRLIGCCIEGDEKMLIYEYENLSLDSYFLGKTQRS.KLNWN 95  
Bo1SRK29 ...CNKLCGEGFGFIVYKGR.LLDGQEIIVKRLSKTSVQGTDEEFMNEVRLIARLQHINVLRLIGCCIEADEKMLIYEYENSSLDYFLGKTQRS.KLNWK 95  
Bo1SRK3 ...CNKLCQGGFGFIVYKGR.LLDGKEIIVKRLSKTSVQGTDEEFMNEVRLIARLQHINVLRLIGCCIEADEKMLIYEYENLSLDSYFLGKTQRS.KLNWK 95  
Bo1SRK18 ...CNKLCQGGFGFIVYKGR.LLDGQEIIVKRLSKTSVQGTDEEFMNEVRLIARLQHINVLRLIGCCIEGDEKMLIYEYENLSLDSYFLGKTQRS.KLNWK 95  
Bo1SRK60 ...CNEICQGGFGFIVYKG..MLDGQEVAVKRLSKTSIQGIDEFMNEVRLIARLQHINVLRLIGCCIEADEKILLIYEYENSSLDYFLFGKKRSS.NLNWK 94  
Bo1SRK13 ...CNEICQGGFGFIVYKG..MLDGQEVAVKRLSKTSIQGIDEFMNEVRLIARLQHINVLRLIGCCIEADEKILLIYEYENSSLDYFLFGKKRSS.NLNWK 94  
Bo1SRK7 ...CNEICQGGFGFIVYKG..MLDGQEVAVKRLSKTSIQGIDEFMNEVRLIARLQHINVLRLIGCCIEADEKILLIYEYENSSLDYFLFGKKRSS.NLDWK 94  
Bo1SRK13b ...CNEICQGGFGFIVYKG..MLDGQEVAVKRLSKTSIQGIDEFMNEVRLIARLQHINVLRLIGCCIEADEKILLIYEYENSSLDYFLFGKKRSS.NLNWK 94  
Bo1SRK23 ...CNKLCQGGFGFIVYKGT.LIDGQEIIVKRLSKTSIQGIDEFMNEVRLIARLQHINVLRLIGCCIEADEKMLIYEYENLSLDSYIFGNPRST.KLNWK 95  
Bo1SRK28 ...CNEICQGGFGFIVYKG..MLDGQEVAVKRLSKTSIQGIDEFMNEVRLIARLQHINVLRLIGCCIEADEKILLIYEYENSSLDYFLFGKKRSS.NLNWK 94  
Bo1S-12SRK ...SNKICQGGFGFIVYKGI.LLDGQEIIVKRLSKTSVQGTDEEFMNEVRLIARLQHINVLRLIGCCIDADEKMLIYEYENLSLDSYFLGKTQRS.KLNWK 95  
Bo1SRK-14 ...CNKLCQGGFGFIVYKGR.LLDGQEVAVKRLSKTSVQGTDEEFMNEVRLIARLQHINVLRLIGCCIEADEKMLIYEYENLSLDSYFLGKTQRS.KLNWK 94  
Bo1SRK-4 ...CNEICQGGFGFIVYKG..MLDGQEVAVKRLSKTSIQGIDEFMNEVRLIARLQHINVLRLIGCCIEAGEKILLIYEYENSSLDYFLFGKKRSS.NLNWK 94  
Bo1SRK-52 ...CKKLCGEGFGFIVYKGR.LLDGQEIIVKRLSKTSVQGTDEEFMNEVRLIARLQHINVLRLIGCCIEADEKMLIYEYENLSLDSYFLGKTQRS.KLNWK 95  
Bo1SRK-61 ...CNKLCQGGFGFIVYKGR.LLDGQEIIVKRLSKTSVQGTDEEFMNEVRLIARLQHINVLRLIGCCIEADEKMLIYEYENLSLDSYFLGKTQRS.KLNWK 94  
Bo1SRK-68 ...NELCQGGFGFIVYKGR.LPDGQEIIVKRLSKTSIQGIDEFMNEVRLIARLQHINVLRLIGCCIEADEKMLIYEYENSSLDYFLFGKKRSS.KLNWK 95  
BnaSRK ...CNKLCQGGFGFIVYKGR.LLDGQEIIVKRLSKTSVQGTDEEFMNEVRLIARLQHINVLRLIGCCIEADEKMLIYEYENLSLDSYFLGKNRSS.TLNWK 95  
BraSRK2007 ...SNKICQGGFGFIVYKGI.LLDGQEIIVKRLSKTSVQGTDEEFMNEVRLIARLQHINVLRLIGCCIDADEKMLIYEYENLSLDSYFLGKTQRS.KLNWK 95  
RsaSRK-a ...NKLCGEGFGFIVYKGR.LLDGQEVAVKRLSKTSIQGIDEFMNEVRLIARLQHINVLRLIGCCIDPDDEKILLIYEYENSSLDYFLGKTQRS.NLNWK 94  
AhaSRK ...NILCQGGFGFIVYKGR.LLDGQEIIVKRLSEMSAQGTNEEFMNEVRLIARLQHINVLRLSCCIYADEKILLIYEYENSSLDYFLGKTQRS.NLNWK 95  
AhaSRK04 ...NILCGRGGFGFIVYKGR.LLDGQEIIVKRLSEMSAQGTNEEFMNEVRLIARLQHINVLRLSCCIYADEKILLIYEYENSSLDYFLGKTQRS.NLNWK 95  
AlySRK25 ...NILCGRGGFGFIVYKGR.LPDGQEIIVKRLSEMSAQGTNEEFMNEVRLIARLQHINVLRLSCCIYADEKILLIYEYENSSLDYFLGKTQRS.NLNWK 94  
AlySRK20 ...SNKLCGEGFGFIVYKGR.LLDGQEIIVKRLSKTSVQGTNEEFMNEVRLIARLQHINVLRLIGCCIDADEKMLIYEYENLSLDSYFLGKTQRS.KLNWK 95  
AlySRK13 ...NILCQGGFGFIVYKGR.LPDGQEIIVKRLSKTSVQGTNEEFMNEVRLIARLQHINVLRLIGCCIDADEKMLIYEYENLSLDSYFLGKTQRS.KLNWK 94  
AlySRK6 ...SIINKLCGEGFGFIVYKGR.LIDGQEIIVKRLSKTSVQGTNEEFMNEVRLIARLQHINVLRLIGCCIDADEKMLIYEYENLSLDSYFLGKTQRS.ELNWK 97  
AlySRK37 ...IILCQGGFGFIVYKGR.LLDGQEIIVKRLSEMSAQGTNEEFMNEVRLIARLQHINVLRLSCCIYADEKILLIYEYENSSLDYFLGKTQRS.NLNWK 95  
AchSRK ...NILCGRGGFGFIVYKGR.LLDGQEIIVKRLSEMSAQGTNEEFMNEVRLIARLQHINVLRLSCCIYADEKILLIYEYENSSLDYFLGKTQRS.NLNWK 95  
CgrSRK7 ...NILCGRGGFGFIVYKGR.LLGSQNIIVKRLSKTSVQGTNEEFMNEVRLIARLQHINVLRLSCCIYADEKILLIYEYENSSLDYFLGKTQRS.NLNWK 95  
CruSRK ...FESHNKICGEGFGFIVYKGR.LLDGQEIIVKRLSKTSIQGIDEFMNEVRLIARLQHINVLRLIGCCIDDEKILLIYEYENSSLDYFLGKTQRS.MLNWK 98  
Oo01g57560 ..INNKLCEGFGFIVYKGR.LEDGQEIIVKRLSKTSVQGTDEEFMNEVRLIARLQHINVLRLIGCCIDADEKMLIYEYENLSLDSYFLGKTQRS.NLNWK 85  
Oo05g42210 ...ADNKLCEGFGFIVYKGT.LEDGQEIIVKRLSKTSVQGTDEEFMNEVRLIARLQHINVLRLIGCCIDADEKMLIYEYENLSLDSYFLGKTQRS.NLNWK 96  
Pt04G028000 ...ENKLCGEGFGFIVYKGR.LVEGQEVAVKRLSKTSVQGTDEEFMNEVRLIARLQHINVLRLIGCCIDADEKMLIYEYENLSLDSYFLGKTQRS.NLNWK 95  
Pt11G037100 ...ENKLCGEGFGFIVYKGR.LVEGQEVAVKRLSKTSVQGTDEEFMNEVRLIARLQHINVLRLIGCCIDADEKMLIYEYENLSLDSYFLGKTQRS.NLNWK 95  
AT4G21380 ...ANKLCEGFGFIVYKGR.LLDGQEIIVKRLSKTSVQGTDEEFMNEVRLIARLQHINVLRLIGCCIDADEKMLIYEYENLSLDSYFLGKTQRS.NLNWK 95  
AT1G65790 ...NDNKLCEGFGFIVYKGR.LLDGQEIIVKRLSKTSVQGTDEEFMNEVRLIARLQHINVLRLIGCCIDADEKMLIYEYENLSLDSYFLGKTQRS.NLNWK 96  
AT1G65800 ...TDNKLCEGFGFIVYKGR.LLDGQEIIVKRLSKTSVQGTDEEFMNEVRLIARLQHINVLRLIGCCIDADEKMLIYEYENLSLDSYFLGKTQRS.NLNWK 96  
Oo07g36544 ...AKLCEGFGFIVYKGR.LDGQEIIVKRLSKTSVQGTDEEFMNEVRLIARLQHINVLRLIGCCIDADEKMLIYEYENLSLDSYFLGKTQRS.NLNWK 94  
Oo01g57510 ...SNKLCGEGFGFIVYKGR.LEDGQEVAVKRLSKTSVQGTDEEFMNEVRLIARLQHINVLRLIGCCIDADEKMLIYEYENLSLDSYFLGKTQRS.NLNWK 95  
Oo03g35600 ...ADNKLCEGFGFIVYKGR.LDGQEIIVKRLSKTSVQGTDEEFMNEVRLIARLQHINVLRLIGCCIDADEKMLIYEYENLSLDSYFLGKTQRS.NLNWK 96  
Consensus g gfg v a ls s qg ef e li h lv l y

BraSRK40 MRFDIINGIARGILYHQDSRFRIIHRDIKASNVLLDKDMPKISDFGMARIFGRDETEADTRKVVGTGYGMSPEYAMNGTFSMKSDVESFGVLLLEIIS 194  
BraSRK44 MRFDIINGIARGILYHQDSRFRIIHRDIKASNVLLDKDMPKISDFGMARIFGRDETEADTRKVVGTGYGMSPEYAMNGTFSMKSDVESFGVLLLEIIS 194  
BraSRK29 MRFDIINGIARGILYHQDSRFRIIHRDIKASNVLLDKDMPKISDFGMARIFGRDETEADTRKVVGTGYGMSPEYAMNGTFSMKSDVESFGVLLLEIIS 194  
BraSRK60 MRFDIINGIARGILYHQDSRFRIIHRDIKASNVLLDKDMPKISDFGMARIFGRDETEADTRKVVGTGYGMSPEYAMNGTFSMKSDVESFGVLLLEIIS 194  
BraSRK12 DRFPAITNEVARGILYHQDSRFRIIHRDIKASNVLLDKDMPKISDFGMARIFARDEIQTADNAVGTGYGMSPEYAMNGTFSMKSDVESFGVLLLEIIS 194  
BraSRK46 DRFPAITNEVARGILYHQDSRFRIIHRDIKASNVLLDKDMPKISDFGMARIFARDEIQTADNAVGTGYGMSPEYAMNGTFSMKSDVESFGVLLLEIIS 194  
BraSRK8 DRFPAITNEVARGILYHQDSRFRIIHRDIKASNVLLDKDMPKISDFGMARIFARDEIQTADNAVGTGYGMSPEYAMNGTFSMKSDVESFGVLLLEIIS 194  
BraSRK9 ERFDITNEVARGILYHQDSRFRIIHRDIKASNVLLDKDMPKISDFGMARIFARDEIQTADNAVGTGYGMSPEYAMNGTFSMKSDVESFGVLLLEIIS 194  
BraSRK22 DRFPAITNEVARGILYHQDSRFRIIHRDIKASNVLLDKDMPKISDFGMARIFARDEIQTADNAVGTGYGMSPEYAMNGTFSMKSDVESFGVLLLEIIS 194  
BraSRK-25 ERFDITNEVARGILYHQDSRFRIIHRDIKASNVLLDKDMPKISDFGMARIFARDEIQTADNAVGTGYGMSPEYAMNGTFSMKSDVESFGVLLLEIIS 194  
BraSRK45 ERFDITNEVARGILYHQDSRFRIIHRDIKASNVLLDKDMPKISDFGMARIFARDEIQTADNAVGTGYGMSPEYAMNGTFSMKSDVESFGVLLLEIIS 195  
BraSRK-53 ERFDITNEVARGILYHQDSRFRIIHRDIKASNVLLDKDMPKISDFGMARIFARDEIQTADNAVGTGYGMSPEYAMNGTFSMKSDVESFGVLLLEIIS 194  
BraSRK-54 DRFPAITNEVARGILYHQDSRFRIIHRDIKASNVLLDKDMPKISDFGMARIFARDEIQTADNAVGTGYGMSPEYAMNGTFSMKSDVESFGVLLLEIIS 194  
BraSRK-55 DRFPAITNEVARGILYHQDSRFRIIHRDIKASNVLLDKDMPKISDFGMARIFARDEIQTADNAVGTGYGMSPEYAMNGTFSMKSDVESFGVLLLEIIS 193  
BraSRK-56 ERFDITNEVARGILYHQDSRFRIIHRDIKASNVLLDKDMPKISDFGMARIFARDEIQTADNAVGTGYGMSPEYAMNGTFSMKSDVESFGVLLLEIIS 195  
BraSRK-61 DRFPAITNEVARGILYHQDSRFRIIHRDIKASNVLLDKDMPKISDFGMARIFARDEIQTADNAVGTGYGMSPEYAMNGTFSMKSDVESFGVLLLEIIS 194  
Bo1SRK15 MRFDIINGIARGILYHQDSRFRIIHRDIKASNVLLDKDMPKISDFGMARIFGRDETEADTRKVVGTGYGMSPEYAMNGTFSMKSDVESFGVLLLEIIS 194  
Bo1SRK2 MRFDIINGIARGILYHQDSRFRIIHRDIKASNVLLDKDMPKISDFGMARIFGRDETEADTRKVVGTGYGMSPEYAMNGTFSMKSDVESFGVLLLEIIS 194  
Bo1SRK5 MRFDIINGIARGILYHQDSRFRIIHRDIKASNVLLDKDMPKISDFGMARIFGRDETEADTRKVVGTGYGMSPEYAMNGTFSMKSDVESFGVLLLEIIS 194  
Bo1SRK6 ERFDITNEVARGILYHQDSRFRIIHRDIKASNVLLDKDMPKISDFGMARIFGRDETEADTRKVVGTGYGMSPEYAMNGTFSMKSDVESFGVLLLEIIS 195  
Bo1SRK29 ERFDITNEVARGILYHQDSRFRIIHRDIKASNVLLDKDMPKISDFGMARIFGRDETEADTRKVVGTGYGMSPEYAMNGTFSMKSDVESFGVLLLEIIS 195  
Bo1SRK3 ERFDITNEVARGILYHQDSRFRIIHRDIKASNVLLDKDMPKISDFGMARIFGRDETEADTRKVVGTGYGMSPEYAMNGTFSMKSDVESFGVLLLEIIS 195  
Bo1SRK18 ERFDITNEVARGILYHQDSRFRIIHRDIKASNVLLDKDMPKISDFGMARIFGRDETEADTRKVVGTGYGMSPEYAMNGTFSMKSDVESFGVLLLEIIS 195  
Bo1SRK60 DRFPAITNEVARGILYHQDSRFRIIHRDIKASNVLLDKDMPKISDFGMARIFARDEIQTADNAVGTGYGMSPEYAMNGTFSMKSDVESFGVLLLEIIS 194  
Bo1SRK13 DRFPAITNEVARGILYHQDSRFRIIHRDIKASNVLLDKDMPKISDFGMARIFARDEIQTADNAVGTGYGMSPEYAMNGTFSMKSDVESFGVLLLEIIS 194  
Bo1SRK7 DRFPAITNEVARGILYHQDSRFRIIHRDIKASNVLLDKDMPKISDFGMARIFARDEIQTADNAVGTGYGMSPEYAMNGTFSMKSDVESFGVLLLEIIS 194  
Bo1SRK13b DRFPAITNEVARGILYHQDSRFRIIHRDIKASNVLLDKDMPKISDFGMARIFARDEIQTADNAVGTGYGMSPEYAMNGTFSMKSDVESFGVLLLEIIS 194  
Bo1SRK23 ERFDITNEVARGILYHQDSRFRIIHRDIKASNVLLDKDMPKISDFGMARIFARDEIQTADNAVGTGYGMSPEYAMNGTFSMKSDVESFGVLLLEIIS 195  
Bo1S-12SRK ERFDITNEVARGILYHQDSRFRIIHRDIKASNVLLDKDMPKISDFGMARIFARDEIQTADNAVGTGYGMSPEYAMNGTFSMKSDVESFGVLLLEIIS 195  
Bo1SRK-14 ERFDITNEVARGILYHQDSRFRIIHRDIKASNVLLDKDMPKISDFGMARIFARDEIQTADNAVGTGYGMSPEYAMNGTFSMKSDVESFGVLLLEIIS 194  
Bo1SRK-4 DRFPAITNEVARGILYHQDSRFRIIHRDIKASNVLLDKDMPKISDFGMARIFARDEIQTADNAVGTGYGMSPEYAMNGTFSMKSDVESFGVLLLEIIS 194  
Bo1SRK-52 ERFDITNEVARGILYHQDSRFRIIHRDIKASNVLLDKDMPKISDFGMARIFARDEIQTADNAVGTGYGMSPEYAMNGTFSMKSDVESFGVLLLEIIS 195  
Bo1SRK-61 ERFDITNEVARGILYHQDSRFRIIHRDIKASNVLLDKDMPKISDFGMARIFARDEIQTADNAVGTGYGMSPEYAMNGTFSMKSDVESFGVLLLEIIS 194  
Bo1SRK-68 DRFPAITNEVARGILYHQDSRFRIIHRDIKASNVLLDKDMPKISDFGMARIFARDEIQTADNAVGTGYGMSPEYAMNGTFSMKSDVESFGVLLLEIIS 195  
BnaSRK DRFPAITNEVARGILYHQDSRFRIIHRDIKASNVLLDKDMPKISDFGMARIFARDEIQTADNAVGTGYGMSPEYAMNGTFSMKSDVESFGVLLLEIIS 195  
BraSRK2007 ERFDITNEVARGILYHQDSRFRIIHRDIKASNVLLDKDMPKISDFGMARIFARDEIQTADNAVGTGYGMSPEYAMNGTFSMKSDVESFGVLLLEIIS 195  
RsaSRK-a DRFPAITNEVARGILYHQDSRFRIIHRDIKASNVLLDKDMPKISDFGMARIFARDEIQTADNAVGTGYGMSPEYAMNGTFSMKSDVESFGVLLLEIIS 194  
AhaSRK TRFNIINGIARGILYHQDSRFRIIHRDIKASNVLLDKDMPKISDFGMARIFARDEIQTADNAVGTGYGMSPEYAMNGTFSMKSDVESFGVLLLEIIS 195  
AhaSRK04 TRFNIINGIARGILYHQDSRFRIIHRDIKASNVLLDKDMPKISDFGMARIFARDEIQTADNAVGTGYGMSPEYAMNGTFSMKSDVESFGVLLLEIIS 195  
AlySRK25 KRFNIINGIARGILYHQDSRFRIIHRDIKASNVLLDKDMPKISDFGMARIFARDEIQTADNAVGTGYGMSPEYAMNGTFSMKSDVESFGVLLLEIIS 194  
AlySRK20 MRFDIINGIARGILYHQDSRFRIIHRDIKASNVLLDKDMPKISDFGMARIFGRDETEADTRKVVGTGYGMSPEYAMNGTFSMKSDVESFGVLLLEIIS 195  
AlySRK13 KRFNIINGIARGILYHQDSRFRIIHRDIKASNVLLDKDMPKISDFGMARIFARDEIQTADNAVGTGYGMSPEYAMNGTFSMKSDVESFGVLLLEIIS 194  
AlySRK6 TRFNIINGIARGILYHQDSRFRIIHRDIKASNVLLDKDMPKISDFGMARIFARDEIQTADNAVGTGYGMSPEYAMNGTFSMKSDVESFGVLLLEIIS 197  
AlySRK37 TRFNIINGIARGILYHQDSRFRIIHRDIKASNVLLDKDMPKISDFGMARIFARDEIQTADNAVGTGYGMSPEYAMNGTFSMKSDVESFGVLLLEIIS 195  
AchSRK TRFNIINGIARGILYHQDSRFRIIHRDIKASNVLLDKDMPKISDFGMARIFARDEIQTADNAVGTGYGMSPEYAMNGTFSMKSDVESFGVLLLEIIS 195  
CgrSRK7 KRFNIINGIARGILYHQDSRFRIIHRDIKASNVLLDKDMPKISDFGMARIFARDEIQTADNAVGTGYGMSPEYAMNGTFSMKSDVESFGVLLLEIIS 195  
CruSRK MRFDIINGIARGILYHQDSRFRIIHRDIKASNVLLDKDMPKISDFGMARIFARDEIQTADNAVGTGYGMSPEYAMNGTFSMKSDVESFGVLLLEIIS 198  
Oo01g57560 ARYRIIEGIGIARGILYHQDSRYRIIHRDIKASNVLLDKDMPKISDFGMARIFARDEIQTADNAVGTGYGMSPEYAMNGTFSMKSDVESFGVLLLEIIS 185  
Oo05g42210 TRYFIIEGIGIARGILYHQDSRYRIIHRDIKASNVLLDKDMPKISDFGMARIFARDEIQTADNAVGTGYGMSPEYAMNGTFSMKSDVESFGVLLLEIIS 196  
Pt04G028000 RRFNIICGIGIARGILYHQDSRFRIIHRDIKASNVLLDKDMPKISDFGMARIFARDEIQTADNAVGTGYGMSPEYAMNGTFSMKSDVESFGVLLLEIIS 195  
Pt11G037100 RRFNIICGIGIARGILYHQDSRFRIIHRDIKASNVLLDKDMPKISDFGMARIFARDEIQTADNAVGTGYGMSPEYAMNGTFSMKSDVESFGVLLLEIIS 195  
AT4G21380 MRFDIINGIARGILYHQDSRFRIIHRDIKASNVLLDKDMPKISDFGMARIFARDEIQTADNAVGTGYGMSPEYAMNGTFSMKSDVESFGVLLLEIIS 195  
AT1G65790 KRFDIINGIARGILYHQDSRFRIIHRDIKASNVLLDKDMPKISDFGMARIFARDEIQTADNAVGTGYGMSPEYAMNGTFSMKSDVESFGVLLLEIIS 196  
AT1G65800 KRFDIINGIARGILYHQDSRFRIIHRDIKASNVLLDKDMPKISDFGMARIFARDEIQTADNAVGTGYGMSPEYAMNGTFSMKSDVESFGVLLLEIIS 196  
Oo07g36544 KRFNIILGIGIARGILYHQDSRFRIIHRDIKASNVLLDKDMPKISDFGMARIFARDEIQTADNAVGTGYGMSPEYAMNGTFSMKSDVESFGVLLLEIIS 193  
Oo01g57510 KRFDIINGIARGILYHQDSRFRIIHRDIKASNVLLDKDMPKISDFGMARIFARDEIQTADNAVGTGYGMSPEYAMNGTFSMKSDVESFGVLLLEIIS 195  
Oo03g35600 KRFNIINGIARGILYHQDSRFRIIHRDIKASNVLLDKDMPKISDFGMARIFARDEIQTADNAVGTGYGMSPEYAMNGTFSMKSDVESFGVLLLEIIS 196  
Consensus r i g g l l s i h r d k n l l d p k i s d f g m a r i f g r d e t e a d t r k v v g t y g y m p e y a m n g t f s m k s d v e s f g v l l e i i s

BraSRK40 GKRNK.GFCDSDSSLN.LLGCVRWNWKEGGGLEIVDRVIDSS...SPTFRPFEIISRLCIQIGLLCVQERVEDRPMSSVVLM 271  
BraSRK44 GKRNK.GFCDSDSSLN.LLGCVRWNWKEGGGLEIVDRVIDSS...SPTFRPFEIISRLCIQIGLLCVQERVEDRPMSSVVLM 271  
BraSRK29 GKRNK.GFCDSDSSLN.LLGCVRWNWKEGGGLEIVDRVIDSS...SPTFRPFEIISRLCIQIGLLCVQERVEDRPMSSVVLM 271  
BraSRK60 GKRNK.GFCDSDSSLN.LLGCVRWNWKEGGGLEIVDRVIDSS...SPTFRPFEIISRLCIQIGLLCVQERVEDRPMSSVVLM 271  
BraSRK12 GKRNK.GFYQVNPENN.LPSYVWTHWAEGRALIVDPVILDSLSSLPSTFKPKEVLKCIQIGLLCIQERAEHRPTMSSVVW. 273  
BraSRK46 GKRNK.GFYQVNPENN.LPSYVWTHWAEGRALIVDPVILDSLSSLPSTFKPKEVLKCIQIGLLCIQERAEHRPTMSSVVW. 273  
BraSRK8 GKRNK.GFYQVNPENN.LPSYVWTHWAEGRALIVDPVILDSLSSLPSTFKPKEVLKCIQIGLLCIQERAEHRPTMSSVVW. 273  
BraSRK9 GKRNK.EFNN...ENN.LLSYAWSNWKEGRALIVDPVILDSLSSLPSTFKPKEVLKCIQIGLLCVQERAEHRPTMSSVVW. 270  
BraSRK22 GKRNK.GFYQVNPENN.LPSYVWTHWAEGRALIVDPVILDSLSSLPSTFKPKEVLKCIQIGLLCIQERAEHRPTMSSVVW. 273  
BraSRK-25 GKKNK.RFYKLNCEDE.LLSYAWSNWKEGRALIVDPVILDSLSSLPSTFKPKEVLKCIQIGLLCVQERAEHRPTMSSVVW. 265  
BraSRK45 GKRNK.GYN.....FLSYAWSNWKEGRALIVDPVILDSLSSLPSTFKPKEVLKCIQIGLLCVQERAEHRPTMSSVVW. 273  
BraSRK-53 GKKNK.GLYNLFENN.LLSYAWSNWKEGRALIVDPVILDSLSSLPSTFKPKEVLKCIQIGLLCVQERAEHRPTMSSVVW. 273  
BraSRK-54 GKRNK.GFYQVNPENN.LPSYVWTHWAEGRALIVDPVILDSLSSLPSTFKPKEVLKCIQIGLLCIQERAEHRPTMSSVVW. 273  
BraSRK-55 GKRNK.GFYQVNPENN.LPSYVWTHWAEGRALIVDPVILDSLSSLPSTFKPKEVLKCIQIGLLCIQERAEHRPTMSSVVW. 272  
BraSRK-56 GKRNK.VFYNL..... 205  
BraSRK-61 GKRNK.GFYQVNPENN.LPSYVWTHWAEGRALIVDPVILDSLSSLPSTFKPKEVLKCIQIGLLCIQERAEHRPTMSSVVW. 273  
Bo1SRK15 GKRNK.GFCDSDSSLN.LLGCVRWNWKEGGGLEIVDRVIDSS...SPTFRPFEIISRLCIQIGLLCVQERVEDRPMSSVVLM 271  
Bo1SRK2 GKRNK.VFCDSDSSLN.LLGCVRWNWKEGGGLEIVDRVIDSS...SPTFRPFEIISRLCIQIGLLCVQERVEDRPMSSVVLM 271  
Bo1SRK5 GKRNK.GICDSSSLN.LLGCVRWNWKEGGGLEIVDRVIDSS...SPMFRPFEIISRLCIQIGLLCVQERVEDRPMSSVVLM 271  
Bo1SRK6 GKKNK.GFYNLDYEND.LLSYVWTHWAEGRALIVDPVILDSLSSLPSTFKPKEVLKCIQIGLLCVQERAEHRPTMSSVVW. 273  
Bo1SRK29 GKRNK.VFYNLNYEDN.LLSYAWSNWKEGRALIVDPVILDSLSSLPSTFKPKEVLKCIQIGLLCVQERAEHRPTMSSVVW. 273  
Bo1SRK3 GKKNK.GENNLNYEDN.LLSYAWSNWKEGRALIVDPVILDSLSSLPSTFKPKEVLKCIQIGLLCVQERAEHRPTMSSVVW. 271  
Bo1SRK18 GKRNK.GFYNLNYENN.LLSYAWSNWKEGRALIVDPVILDSLSSLPSTFKPKEVLKCIQIGLLCVQERAEHRPTMSSVVW. 274  
Bo1SRK60 GKRNK.GFYQVNPENN.LLSYAWSNWKEGRALIVDPVILDSLSSLPSTFKPKEVLKCIQIGLLCIQERAEHRPTMSSVVW. 273  
Bo1SRK13 GKRNK.GFYQVNPENN.LLSYAWSNWKEGRALIVDPVILDSLSSLPSTFKPKEVLKCIQIGLLCIQERAEHRPTMSSVVW. 273  
Bo1SRK7 GKRNK.GFYQVNPENN.LLSYAWSNWKEGRALIVDPVILDSLSSLPSTFKPKEVLKCIQIGLLCIQERAEHRPTMSSVVW. 273  
Bo1SRK13b GKRNK.GFYQVNPENN.LLSYAWSNWKEGRALIVDPVILDSLSSLPSTFKPKEVLKCIQIGLLCIQERAEHRPTMSSVVW. 273  
Bo1SRK23 GK..... 197  
Bo1SRK28 GKRNK.GFYQVNPENN.LLSYAWSNWKEGRALIVDPVILDSLSSLPSTFKPKEVLKCIQIGLLCIQERAEHRPTMSSVVW. 273  
Bo1S-12SRK GKRNK.GFY.....EDN.LLSYAWSNWKEGRALIVDPVILDSLSSLPSTFKPKEVLKCIQIGLLCVQERAEHRPTMSSVVW. 269  
Bo1SRK-14 GKKNK.GFYKLNCEDE.LLSYAWSNWKEGRALIVDPVILDSLSSLPSTFKPKEVLKCIQIGLLCVQERAEHRPTMSSVVW. 274  
Bo1SRK-4 GKRNK.GFYQVNPENN.LLSYAWSNWKEGRALIVDPVILDSLSSLPSTFKPKEVLKCIQIGLLCIQERAEHRPTMSSVVW. 273  
Bo1SRK-52 GKRNK.VFYNLNYEDN.LLSYAWSNWKEGRALIVDPVILDSLSSLPSTFKPKEVLKCIQIGLLCVQERAEHRPTMSSVVW. 274  
Bo1SRK-61 GKKNK.GFYNLNEND.LLSYAWSNWKEGRALIVDPVILDSLSSLPSTFKPKEVLKCIQIGLLCVQERAEHRPTMSSVVW. 272  
Bo1SRK-68 GK..... 197  
BnaSRK GKRNK.GFYNLNENN.LLSYAWSNWKEGRALIVDPVILDSLSSLPSTFKPKEVLKCIQIGLLCVQERAEHRPTMSSVVW. 274  
BnaSRK2007 GKRNK.GFD.....EDN.LLSYAWSNWKEGRALIVDPVILDSLSSLPSTFKPKEVLKCIQIGLLCVQERAEHRPTMSSVVW. 270  
RsaSRK-a GKRNK.GFYQSNPENN.LVYAWTHWAEGRALIVDPVILDSLSSLPSTFKPKEVLKCIQIGLLCIQERAEHRPTMSSVVW. 270  
AhaSRK GKRNK.GFHNSSQDNN.LLGYTWENWKEGGGLEIVDSIVSSSS.MSLFRPFEIISRLCIQIGLLCVQERAEHRPTMSSVVW. 274  
AhaSRK04 GKRNK.GFHNSSQDNN.LLGYTWENWKEGGGLEIVDSIVSSSS.MSLFRPFEIISRLCIQIGLLCVQERAEHRPTMSSVVW. 274  
AlySRK25 GKRNK.GFYNSNQDNN.LLSYTWENWKEGGGLEIVDSIVSSSS.FSMFRPFEIISRLCIQIGLLCVQERAEHRPTMSSVVW. 271  
AlySRK20 GKKNK.GFYNSNQDNN.LLSYAWSNWKEGGGLEIVDSIVSSSS.PSAFRPFEIISRLCIQIGLLCVQERAEHRPTMSSVVW. 272  
AlySRK13 GKRNK.GFYNSNQDNN.LLSYTWENWKEGGGLEIVDSIVSSSS.SSTFRPFEIISRLCIQIGLLCVQERAEHRPTMSSVVW. 271  
AlySRK6 GK..... 199  
AlySRK37 GKRNK.GFHNSSQDNN.LLGYTWENWKEGGGLEIVDSIVSSSS.MSLFRPFEIISRLCIQIGLLCVQERAEHRPTMSSVVW. 274  
AchSRK GKRNK.GFHNSSQDNN.LLGYTWENWKEGGGLEIVDSIVSSSS.MSLFRPFEIISRLCIQIGLLCVQERAEHRPTMSSVVW. 274  
CgrSRK7 GKRNK.GFYNSNQDNN.LLGYTWENWKEGGGLEIVDSIVSSSS.MSLFRPFEIISRLCIQIGLLCVQERAEHRPTMSSVVW. 273  
CruSRK GRRNR.GFYNSNRDLN.LLGCVRWNWKEGGGLEIVDPVIDSS...SSTFRPFEIISRLCIQIGLLCVQERAEHRPTMSSVVW. 275  
Oo01g57560 GRRNR.GVYSYSNHLN.LLGHAWSLWNEGGKLELADETMG.....SFDSEVLKCIQIGLLCVQENPDRPMLSQVIL. 256  
Oo05g42210 GKRNK.GFYYSSELN.LLGHAWSLWNEGGKLELADETMG.....SFDSEVLKCIQIGLLCVQENPDRPMLSQVIL. 268  
Pt04G028000 GKRNK.GFYHSFELN.LLGHAWSLWNEGGKLELADETMG.....SFDSEVLKCIQIGLLCVQENPDRPMLSQVIL. 266  
Pt11G037100 SKRNK.GFYNSNRDLN.LLGCVRWNWKEGGGLEIVDPVIDSS...SSTFRPFEIISRLCIQIGLLCVQERAEHRPTMSSVVW. 269  
AT4G21380 GKRNK.GFYNSNRDLN.LLGFVWRHWKEGGGLEIVDPVIDSS...SSTFRPFEIISRLCIQIGLLCVQERAEHRPTMSSVVW. 272  
AT1G65790 GKKNK.GFYNSNRDLN.LLGFVWRHWKEGGGLEIVDPVIDSS...SSTFRPFEIISRLCIQIGLLCVQERAEHRPTMSSVVW. 272  
AT1G65800 GKKNK.GFYNSNRDLN.LLGFVWRHWKEGGGLEIVDPVIDSS...SSTFRPFEIISRLCIQIGLLCVQERAEHRPTMSSVVW. 216  
Oo07g36544 GRR..... 198  
Oo01g57510 GRR..... 198  
Oo03g35600 GKKNK.GFYHNLNEN.LLSYAWSLWKEGGKLELADETMG.....SSNVTEVLRICIQIGLLCVQERAEHRPTMSSVVW. 270  
Consensus
